# Supplementary material for: The monitoring network of greenhouse gas (CO 2 , CH 4 ) in the Paris' region
Source: Copernicus journal article supplement (doi:10.5194/egusphere-2024-2826), 2024-09-18
Supplement: Supplementary file 1 [file egusphere-2024-2826-supplement.pdf]

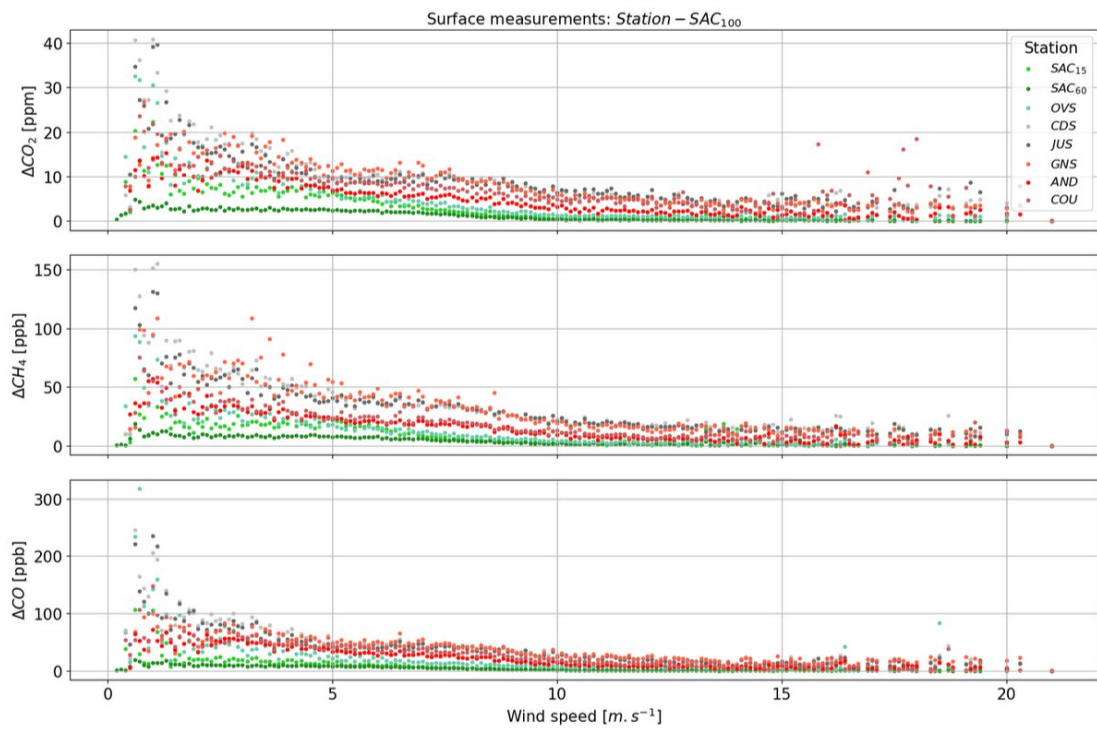

**Figure S1 : CO<sub>2</sub>, CH<sub>4</sub> and CO gradients between stations and SAC<sub>100</sub> (background) as a function of the wind speed ( $\text{m}\cdot\text{s}^{-1}$ ), with  $0.1 \text{ m}\cdot\text{s}^{-1}$  bins.**
